# Supplementary material for: Long-term inter- and intraspecific dietary variation in sibling seabird species
Source: Springer Nature journal article supplement (doi:10.1007/s00227-021-03839-6), 2021-02-11
Supplement: 227_2021_3839_MOESM1_ESM.pdf [file 227_2021_3839_MOESM1_ESM.pdf]

# Long-term inter- and intraspecific dietary variation in sibling seabird species

William F. Mills, Tim I. Morley, Stephen C. Votier, Richard A. Phillips

## Supporting information

**Table S1.** Number of diet samples obtained from northern giant petrel *Macronectes halli* and southern giant petrel *M. giganteus* chicks at Bird Island, South Georgia, during three seasons (2014/15–2016/17).

| Breeding season | Sampling period | Northern giant petrel | Southern giant petrel |
|-----------------|-----------------|-----------------------|-----------------------|
| 2014/15         | Early January   | -                     | -                     |
|                 | Late January    | 10                    | -                     |
|                 | Early February  | 5                     | 5                     |
|                 | Late February   | 5                     | 5                     |
|                 | Early March     | 2                     | 5                     |
|                 | Late March      | -                     | 5                     |
|                 | Early April     | -                     | -                     |
| 2015/16         | Early January   | 5                     | -                     |
|                 | Late January    | 5                     | -                     |
|                 | Early February  | 5                     | 5                     |
|                 | Late February   | 5                     | 5                     |
|                 | Early March     | 5                     | 5                     |
|                 | Late March      | 4                     | 5                     |
|                 | Early April     | -                     | 3                     |
| 2016/17         | Early January   | 5                     | -                     |
|                 | Late January    | 5                     | -                     |
|                 | Early February  | 5                     | 5                     |
|                 | Late February   | 10                    | 11                    |
|                 | Early March     | -                     | -                     |
|                 | Late March      | 5                     | 9                     |
|                 | Early April     | -                     | 5                     |

**Table S2.** Cephalopods identified in the diets of northern giant petrel *Macronectes halli* and southern giant petrel *M. giganteus* chicks at Bird Island, South Georgia (2015–2017). LRL = lower rostral length. Values are means  $\pm$  SDs.

| <b>Giant petrel species</b> | <b>Cephalopod family</b> | <b>Cephalopod species</b>          | <b><i>n</i></b> | <b>LRL (mm)</b> |
|-----------------------------|--------------------------|------------------------------------|-----------------|-----------------|
| Northern giant petrel       | Cranchiidae              | <i>Galiteuthis glacialis</i>       | 1               | 5.2             |
|                             | Gonatidae                | <i>Gonatus antarcticus</i>         | 1               | 6.9             |
|                             | Histioteuthidae          | <i>Histioteuthis eltaninae</i>     | 1               | 3.8             |
|                             | Neoteuthidae             | <i>Alluroteuthis antarcticus</i>   | 1               | 3.6             |
|                             | Ommastrephidae           | <i>Illex argentinus</i>            | 2               | 4.0 $\pm$ 0.4   |
|                             |                          | <i>Martialia hyadesi</i>           | 2               | 3.3             |
|                             | Onychoteuthidae          | <i>Moroteuthopsis longimana</i>    | 2               | 11.5 $\pm$ 0.4  |
|                             | Psychroteuthidae         | <i>Psychroteuthis glacialis</i>    | 1               | -               |
| Southern giant petrel       | Cranchiidae              | <i>Galiteuthis glacialis</i>       | 7               | 4.6 $\pm$ 0.8   |
|                             | Mastigoteuthidae         | <i>Mastigoteuthis psychrophila</i> | 1               | 2.7             |
|                             | Ommastrephidae           | <i>Martialia hyadesi</i>           | 5               | 4.1 $\pm$ 1.1   |
|                             | Onychoteuthidae          | <i>Moroteuthis knipovitchi</i>     | 3               | 5.7 $\pm$ 0.3   |
|                             |                          | <i>Moroteuthis</i> sp. B (Imber)   | 1               | 6.3             |
|                             |                          | <i>Moroteuthopsis longimana</i>    | 8               | 4.9 $\pm$ 1.1   |
|                             | Psychroteuthidae         | <i>Psychroteuthis glacialis</i>    | 3               | 4.9 $\pm$ 1.1   |

**Table S3.** Diet composition of northern giant petrel *Macronectes halli* chicks at Bird Island, South Georgia most recently provisioned by either a male or female parent in 2015–2017. Percentage frequency of occurrence (%FO) is shown with percentage drained mass (%M<sub>drained</sub>) of the major important dietary components (see text) in parentheses.

|                              | Male                 |                      |                      | Female               |                      |                       |
|------------------------------|----------------------|----------------------|----------------------|----------------------|----------------------|-----------------------|
|                              | 2015 ( <i>n</i> = 6) | 2016 ( <i>n</i> = 5) | 2017 ( <i>n</i> = 8) | 2015 ( <i>n</i> = 5) | 2016 ( <i>n</i> = 4) | 2017 ( <i>n</i> = 12) |
| SEAL CARRION                 | 33.3 (15.4)          | 60.0 (33.4)          | 37.5 (25.2)          | 20.0 (16.6)          | 50.0 (43.4)          | 16.7 (12.0)           |
| Unidentified seals           | 40.0                 | 60.0                 | 37.5                 | 20.0                 | 50.0                 | 16.7                  |
| PENGUIN                      | 50.0 (32.1)          | 80.0 (57.4)          | 12.5 (38.1)          | 60.0 (42.3)          | 100.0 (26.3)         | 83.3 (49.3)           |
| Unidentified penguins        | 50.0                 | 80.0                 | 12.5                 | 60.0                 | 100.0                | 83.3                  |
| OTHER SEABIRDS               | 66.6 (24.3)          | 60.0 (7.8)           | 62.5 (25.0)          | 60.0 (23.3)          | 50.0 (25.1)          | 25.0 (6.9)            |
| <i>Pachyptila desolata</i>   | 16.7                 | -                    | -                    | -                    | -                    | -                     |
| <i>Pelecanoides</i> spp.     | -                    | 20.0                 | 12.5                 | -                    | 25.0                 | 25.0                  |
| Unidentified seabirds        | 33.3                 | 60.0                 | 62.5                 | 60.0                 | 25.0                 | -                     |
| CEPHALOPODS                  | 50.0 (2.1)           | -                    | 37.5 (0.7)           | 60.0 (11.7)          | 50.0 (0.7)           | 16.7 (0.7)            |
| <i>Illex argentinus</i>      | -                    | -                    | -                    | -                    | -                    | 8.3                   |
| Unidentified cephalopods     | 50.0                 | -                    | 37.5                 | 60.0                 | 50.0                 | 8.3                   |
| FISHES                       | 33.3 (14.3)          | 20.0 (0.1)           | 25.0 (10.3)          | 20.0 (2.3)           | 25.0 (0.3)           | 0.0 (0.0)             |
| Unidentified fishes          | 33.3                 | 20.0                 | 25.0                 | 20.0                 | 25.0                 | 0.0                   |
| CRUSTACEANS                  | 50.0 (9.7)           | -                    | 25.0 (0.3)           | 40.0 (2.5)           | -                    | 50.0 (29.2)           |
| <i>Euphausia superba</i>     | 50.0 (9.7)           | -                    | 25.0 (0.3)           | 20.0 (1.0)           | -                    | 50.0 (29.2)           |
| <i>Themisto gaudichaudii</i> | -                    | -                    | -                    | -                    | -                    | 8.3                   |
| Unidentified crustaceans     | -                    | -                    | -                    | 40.0                 | -                    | 8.3                   |

**Table S4.** Diet composition of southern giant petrel *Macronectes giganteus* chicks at Bird Island, South Georgia most recently provisioned by either a male or female parent in 2015–2017. Percentage frequency of occurrence (%FO) is shown with percentage drained mass (%M<sub>drained</sub>) of the major important dietary components (see text) in parentheses.

|                                 | Male                 |                      |                      | Female               |                      |                       |
|---------------------------------|----------------------|----------------------|----------------------|----------------------|----------------------|-----------------------|
|                                 | 2015 ( <i>n</i> = 2) | 2016 ( <i>n</i> = 3) | 2017 ( <i>n</i> = 6) | 2015 ( <i>n</i> = 2) | 2016 ( <i>n</i> = 4) | 2017 ( <i>n</i> = 10) |
| SEAL CARRION                    | 50.0 (48.0)          | 100.0 (94.6)         | 50.0 (47.7)          | -                    | 75.0 (13.0)          | -                     |
| Unidentified seal               | 50.0                 | 100.0                | 50.0                 | -                    | 75.0                 | -                     |
| PENGUIN                         | 100.0 (33.2)         | 100.0 (0.5)          | 66.7 (33.1)          | 100.0 (24.9)         | 100.0 (74.3)         | 100.0 (37.3)          |
| Unidentified penguins           | 100.0                | 100.0                | 66.7                 | 100.0                | 100.0                | 100.0                 |
| OTHER SEABIRDS                  | 100.0 (10.6)         | 33.3 (4.7)           | 83.3 (11.4)          | 100.0 (7.2)          | 50.0 (9.3)           | 40.0 (4.4)            |
| <i>Pachyptila desolata</i>      | -                    | -                    | -                    | -                    | 50.0                 | -                     |
| <i>Pelecanoides</i> spp.        | -                    | 33.3                 | 16.7                 | -                    | -                    | 10.0                  |
| Unidentified seabirds           | 100.0                | 33.3                 | 66.7                 | 100.0                | 50.0                 | 30.0                  |
| CEPHALOPODS                     | -                    | 33.3 (0.2)           | 33.3 (1.0)           | -                    | 75.0 (0.2)           | 30.0 (1.4)            |
| <i>Galiteuthis glacialis</i>    | -                    | -                    | 16.7                 | -                    | 25.0                 | -                     |
| <i>Moroteuthopsis longimana</i> | -                    | -                    | 16.7                 | -                    | 25.0                 | 10.0                  |
| <i>Psychroteuthis glacialis</i> | -                    | -                    | -                    | -                    | -                    | 10.0                  |
| Unidentified cephalopods        | -                    | 33.3                 | -                    | -                    | 25.0                 | 20.0                  |
| FISHES                          | 50.0 (7.8)           | -                    | 16.7 (6.4)           | 50.0 (61.4)          | 25.0 (1.0)           | 20.0 (2.4)            |
| Unidentified fishes             | 50.0                 | -                    | 16.7                 | 50.0                 | 25.0                 | 20.0                  |
| CRUSTACEANS                     | 100.0 (0.4)          | -                    | 50.0 (0.3)           | 100.0 (6.5)          | 25.0 (0.4)           | 50.0 (54.4)           |
| <i>Euphausia superba</i>        | 50.0 (0.3)           | -                    | 50.0 (0.3)           | 50.0 (3.1)           | -                    | 50.0 (53.6)           |
| Unidentified crustaceans        | 50.0                 | -                    | -                    | 50.0                 | 25.0                 | 10.0                  |
